# Supplementary material for: Pre- and post-experimental manipulation assessments confirm the increase in number of birds due to the addition of nest boxes
Source: PeerJ. 2016 Mar 15;4:e1806. doi: 10.7717/peerj.1806 (PMC4797770; doi:10.7717/peerj.1806)
Supplement: File S2 — Numbers of birds counted on each plot in each visit. [file peerj-04-1806-s002.xls]

## Sheet: peerj-review-7418-Datebird.csv
Forest	Locality	Point	Year	Visit	Treatment	Nat. Cavities	Used 2009	Used 2011	Boxes	Total cavities	S.caroliniana	S. pygmaea	T. aedon	C. americana	P. sclateri	S. mexicana	TotalAves	Boxes used	Initial birds	Breding pairs
Mature	Ixtenco	M1	2010	1	T1	8	0		10	18	0	0	0	0	0	0	0	0	0	0
Mature	Ixtenco	M1	2010	2	T1	8	0		10	18	0	0	0	0	0	0	0	0	1	0
Mature	Ixtenco	M1	2010	3	T1	8	0		10	18	0	0	0	0	0	0	0	0	1	0
Mature	Ixtenco	M1	2010	4	T1	8	0		10	18	3	0	0	0	0	0	3	0	0	0
Mature	Ixtenco	M1	2010	5	T1	8	0		10	18	0	0	0	1	0	0	1	0	0	0
Mature	Ixtenco	M1	2010	6	T1	8	0		10	18	0	1	0	0	0	0	1	0	2	0
Mature	Ixtenco	M1	2010	7	T1	8	0		10	18	0	0	0	0	0	0	0	0	0	0
Mature	Ixtenco	M1	2010	8	T1	8	1		10	18	0	0	0	0	0	0	2	0	1	0
Mature	Ixtenco	M1	2010	9	T1	8	1		10	18	0	0	0	0	0	0	0	0	2	0
Mature	Ixtenco	M1	2010	10	T1	8	0		10	18	0	0	0	0	0	0	0	0	3	0
Mature	Ixtenco	M1	2011	1	T2	5		0	6	11	0	0	0	0	0	0	0	0	1	0
Mature	Ixtenco	M1	2011	2	T2	5		0	6	11	0	0	0	0	2	0	2	0	0	0
Mature	Ixtenco	M1	2011	3	T2	5		2	6	11	0	4	0	1	0	0	5	0	0	2
Mature	Ixtenco	M1	2011	4	T2	5		0	6	11	1	0	0	1	0	0	2	0	2	0
Mature	Ixtenco	M1	2011	5	T2	5		0	6	11	2	0	0	0	0	0	2	0	0	0
Mature	Ixtenco	M1	2011	6	T2	5		0	6	11	2	0	0	2	0	0	4	0	1	0
Mature	Ixtenco	M1	2011	7	T2	5		0	6	11	0	1	0	2	1	0	4	0	2	0
Mature	Ixtenco	M1	2011	8	T2	5		0	6	11	1	0	0	0	0	0	1	0	3	0
Young	Pilares	J1	2010	1	T1	0	0		10	10	0	0	0	0	0	0	0	0	0	0
Young	Pilares	J1	2010	2	T1	0	0		10	10	0	0	0	0	0	0	0	0	0	0
Young	Pilares	J1	2010	3	T1	0	0		10	10	0	0	0	2	0	0	2	0	0	0
Young	Pilares	J1	2010	4	T1	0	0		10	10	0	0	0	0	0	0	0	0	0	0
Young	Pilares	J1	2010	5	T1	0	0		10	10	0	0	0	3	0	0	3	0	0	0
Young	Pilares	J1	2010	6	T1	0	0		10	10	0	0	2	0	0	0	2	1	0	1
Young	Pilares	J1	2010	7	T1	0	0		10	10	0	0	0	0	0	3	3	1	0	1
Young	Pilares	J1	2010	8	T1	0	0		10	10	0	0	0	1	0	0	1	0	0	0
Young	Pilares	J1	2010	9	T1	0	0		10	10	0	0	0	0	1	0	1	0	2	0
Young	Pilares	J1	2011	1	T2	0		0	6	6	0	0	0	0	0	0	0	0	0	0
Young	Pilares	J1	2011	2	T2	0		0	6	6	0	0	0	0	0	0	0	0	0	0
Young	Pilares	J1	2011	3	T2	0		0	6	6	1	0	1	0	0	0	2	0	0	0
Young	Pilares	J1	2011	4	T2	0		0	6	6	0	0	0	1	0	5	6	2	0	2
Young	Pilares	J1	2011	5	T2	0		0	6	6	0	2	0	0	0	0	2	1	0	1
Young	Pilares	J1	2011	6	T2	0		0	6	6	1	0	0	0	0	0	1	0	0	0
Young	Pilares	J1	2011	7	T2	0		0	6	6	0	2	0	0	0	0	2	1	0	1
Young	Pilares	J1	2011	8	T2	0		0	6	6	0	0	0	0	2	0	2	0	2	1
Mature	Ixtenco	M2	2010	1	T1	7	0		10	17	1	0	0	0	0	0	1	0	1	0
Mature	Ixtenco	M2	2010	2	T1	7	0		10	17	0	0	0	1	0	0	1	0	10	0
Mature	Ixtenco	M2	2010	3	T1	7	0		10	17	1	0	0	0	0	0	1	0	1	0
Mature	Ixtenco	M2	2010	4	T1	7	0		10	17	0	0	0	0	0	0	0	0	4	0
Mature	Ixtenco	M2	2010	5	T1	7	0		10	17	0	0	0	2	0	0	2	0	3	0
Mature	Ixtenco	M2	2010	6	T1	7	1		10	17	0	0	0	0	0	0	0	0	2	0
Mature	Ixtenco	M2	2010	7	T1	7	0		10	17	0	0	0	0	0	0	0	0	0	0
Mature	Ixtenco	M2	2010	8	T1	7	0		10	17	0	0	0	0	0	0	0	0	3	0
Mature	Ixtenco	M2	2010	9	T1	7	2		10	17	0	0	0	1	0	0	1	0	1	0
Mature	Ixtenco	M2	2010	10	T1	7	0		10	17	0	0	0	0	0	0	0	0	1	0
Mature	Ixtenco	M2	2011	1	T2	4		0	6	10	0	0	0	3	0	0	3	0	1	0
Mature	Ixtenco	M2	2011	2	T2	4		0	6	10	0	2	0	1	0	0	3	0	4	0
Mature	Ixtenco	M2	2011	3	T2	4		0	6	10	0	0	0	1	0	0	1	0	3	0
Mature	Ixtenco	M2	2011	4	T2	4		1	6	10	0	0	0	1	0	0	1	0	2	0
Mature	Ixtenco	M2	2011	5	T2	4		0	6	10	0	0	1	0	0	0	1	0	0	0
Mature	Ixtenco	M2	2011	6	T2	4		0	6	10	0	0	0	0	0	0	0	0	3	0
Mature	Ixtenco	M2	2011	7	T2	4		0	6	10	0	1	0	0	0	0	1	0	1	0
Mature	Ixtenco	M2	2011	8	T2	4		0	6	10	0	0	1	0	0	0	1	0	1	0
Young	Pilares	J2	2010	1	T1	4	0		10	14	0	0	0	0	0	0	0	0	0	0
Young	Pilares	J2	2010	2	T1	4	0		10	14	0	0	0	0	0	0	0	0	1	0
Young	Pilares	J2	2010	3	T1	4	0		10	14	0	0	0	0	0	0	0	0	1	0
Young	Pilares	J2	2010	4	T1	4	1		10	14	2	2	0	0	0	0	4	0	0	0
Young	Pilares	J2	2010	5	T1	4	0		10	14	0	1	0	2	0	4	7	2	0	2
Young	Pilares	J2	2010	6	T1	4	0		10	14	0	0	2	0	2	2	6	2	0	2
Young	Pilares	J2	2010	7	T1	4	0		10	14	0	0	1	0	0	0	1	0	1	0
Young	Pilares	J2	2010	8	T1	4	0		10	14	0	0	1	0	0	0	1	0	0	0
Young	Pilares	J2	2010	9	T1	4	0		10	14	0	0	0	0	0	0	0	0	1	0
Young	Pilares	J2	2011	1	T2	4		0	6	10	0	2	1	0	0	0	3	0	1	0
Young	Pilares	J2	2011	2	T2	4		0	6	10	0	0	0	0	0	0	0	0	1	0
Young	Pilares	J2	2011	3	T2	4		0	6	10	0	0	0	1	0	0	1	0	0	0
Young	Pilares	J2	2011	4	T2	4		0	6	10	0	0	0	0	2	5	7	3	0	3
Young	Pilares	J2	2011	5	T2	4		0	6	10	0	0	2	0	0	0	2	0	0	0
Young	Pilares	J2	2011	6	T2	4		1	6	10	0	0	2	0	0	3	5	2	1	2
Young	Pilares	J2	2011	7	T2	4		0	6	10	0	1	2	0	0	0	3	0	0	1
Young	Pilares	J2	2011	8	T2	4		0	6	10	2	0	1	0	0	0	3	0	1	1
Mature	Ixtenco	M3	2010	1	C	7	0		0	7	0	0	0	0	0	0	0	0	0	0
Mature	Ixtenco	M3	2010	2	C	7	0		0	7	0	0	0	0	0	0	0	0	0	0
Mature	Ixtenco	M3	2010	3	C	7	0		0	7	0	0	0	0	0	0	0	0	2	0
Mature	Ixtenco	M3	2010	4	C	7	0		0	7	0	0	0	0	2	0	2	0	1	0
Mature	Ixtenco	M3	2010	5	C	7	0		0	7	0	0	0	2	0	0	2	0	4	0
Mature	Ixtenco	M3	2010	6	C	7	0		0	7	0	0	0	0	0	0	0	0	0	0
Mature	Ixtenco	M3	2010	7	C	7	0		0	7	0	0	0	0	0	0	0	0	1	0
Mature	Ixtenco	M3	2010	8	C	7	0		0	7	0	0	0	0	0	0	0	0	1	0
Mature	Ixtenco	M3	2010	9	C	7	1		0	7	0	0	0	1	0	0	1	0	0	0
Mature	Ixtenco	M3	2010	10	C	7	0		0	7	0	0	0	0	0	0	0	0	0	0
Mature	Ixtenco	M3	2011	1	C	7		0	0	7	0	0	0	0	0	0	0	0	2	0
Mature	Ixtenco	M3	2011	2	C	7		0	0	7	0	0	0	1	2	0	3	0	1	0
Mature	Ixtenco	M3	2011	3	C	7		0	0	7	2	0	0	0	0	0	2	0	4	0
Mature	Ixtenco	M3	2011	4	C	7		0	0	7	0	2	0	0	0	0	2	0	0	0
Mature	Ixtenco	M3	2011	5	C	7		0	0	7	0	0	0	2	0	0	2	0	1	0
Mature	Ixtenco	M3	2011	6	C	7		0	0	7	0	2	0	0	0	0	2	0	1	0
Mature	Ixtenco	M3	2011	7	C	7		0	0	7	0	0	0	0	0	0	0	0	0	0
Mature	Ixtenco	M3	2011	8	C	7		0	0	7	0	0	0	0	2	0	2	0	0	0
Young	Pilares	J3	2010	1	T1	1	0		10	11	0	0	0	0	0	0	0	0	10	0
Young	Pilares	J3	2010	2	T1	1	0		10	11	0	0	0	0	0	0	0	0	0	0
Young	Pilares	J3	2010	3	T1	1	0		10	11	0	0	0	0	0	0	0	0	0	0
Young	Pilares	J3	2010	4	T1	1	0		10	11	2	0	0	0	0	0	2	0	0	0
Young	Pilares	J3	2010	5	T1	1	0		10	11	0	0	0	0	0	0	0	0	0	0
Young	Pilares	J3	2010	6	T1	1	0		10	11	1	0	2	0	0	0	3	1	0	1
Young	Pilares	J3	2010	7	T1	1	0		10	11	0	0	1	0	0	0	1	0	0	0
Young	Pilares	J3	2010	8	T1	1	0		10	11	0	0	0	0	0	0	0	0	0	0
Young	Pilares	J3	2010	9	T1	1	0		10	11	0	0	0	0	0	0	0	0	0	0
Mature	Ixtenco	M4	2010	1	C	3	0		0	3	0	0	0	0	0	0	0	0	0	0
Mature	Ixtenco	M4	2010	2	C	3	0		0	3	0	0	0	0	0	0	0	0	0	0
Mature	Ixtenco	M4	2010	3	C	3	0		0	3	1	0	0	0	0	0	1	0	1	0
Mature	Ixtenco	M4	2010	4	C	3	0		0	3	0	0	0	0	0	0	0	0	0	0
Mature	Ixtenco	M4	2010	5	C	3	0		0	3	0	0	0	0	0	0	0	0	2	0
Mature	Ixtenco	M4	2010	6	C	3	1		0	3	0	0	0	0	0	0	0	0	2	0
Mature	Ixtenco	M4	2010	7	C	3	0		0	3	0	0	2	0	0	0	2	0	1	0
Mature	Ixtenco	M4	2010	8	C	3	0		0	3	0	0	2	0	0	0	2	0	0	0
Mature	Ixtenco	M4	2010	9	C	3	0		0	3	0	0	0	0	0	0	0	0	2	0
Mature	Ixtenco	M4	2010	10	C	3	0		0	3	0	0	0	0	0	0	0	0	0	0
Mature	Ixtenco	M4	2011	1	C	3		0	0	3	0	0	0	0	0	0	0	0	1	0
Mature	Ixtenco	M4	2011	2	C	3		0	0	3	0	0	0	1	0	0	1	0	0	0
Mature	Ixtenco	M4	2011	3	C	3		0	0	3	1	0	0	1	0	0	2	0	2	0
Mature	Ixtenco	M4	2011	4	C	3		0	0	3	0	2	0	0	0	0	2	0	2	0
Mature	Ixtenco	M4	2011	5	C	3		0	0	3	2	0	1	0	0	0	3	0	1	0
Mature	Ixtenco	M4	2011	6	C	3		0	0	3	0	0	0	0	0	0	0	0	0	0
Mature	Ixtenco	M4	2011	7	C	3		0	0	3	0	0	0	1	0	0	1	0	2	0
Mature	Ixtenco	M4	2011	8	C	3		0	0	3	0	0	2	0	0	0	2	0	0	0
Young	Pilares	J4	2010	1	T1	1	0		10	11	0	0	0	0	0	0	0	0	1	0
Young	Pilares	J4	2010	2	T1	1	0		10	11	1	0	0	2	0	0	3	0	2	0
Young	Pilares	J4	2010	3	T1	1	0		10	11	0	0	0	0	0	0	0	0	0	0
Young	Pilares	J4	2010	4	T1	1	0		10	11	0	0	0	1	0	0	1	0	0	0
Young	Pilares	J4	2010	5	T1	1	0		10	11	0	0	0	0	2	0	2	0	0	0
Young	Pilares	J4	2010	6	T1	1	0		10	11	0	0	1	0	0	0	1	0	0	0
Young	Pilares	J4	2010	7	T1	1	0		10	11	0	0	0	0	0	0	0	0	0	0
Young	Pilares	J4	2010	8	T1	1	0		10	11	0	0	0	0	0	0	0	0	0	0
Young	Pilares	J4	2010	9	T1	1	0		10	11	0	0	0	0	0	0	0	0	1	0
Mature	Ixtenco	M5	2010	1	C	2	0		0	2	0	0	0	0	0	0	0	0	1	0
Mature	Ixtenco	M5	2010	2	C	2	0		0	2	0	0	0	0	0	0	0	0	0	0
Mature	Ixtenco	M5	2010	3	C	2	0		0	2	0	0	0	0	0	0	0	0	0	0
Mature	Ixtenco	M5	2010	4	C	2	0		0	2	0	0	0	0	0	0	0	0	0	0
Mature	Ixtenco	M5	2010	5	C	2	1		0	2	0	0	0	0	0	0	0	0	0	0
Mature	Ixtenco	M5	2010	6	C	2	0		0	2	0	0	0	0	0	0	0	0	0	0
Mature	Ixtenco	M5	2010	7	C	2	0		0	2	0	0	1	0	0	0	1	0	0	0
Mature	Ixtenco	M5	2010	8	C	2	0		0	2	0	5	0	1	0	0	6	0	1	0
Mature	Ixtenco	M5	2010	9	C	2	0		0	2	0	0	0	0	0	0	0	0	0	0
Mature	Ixtenco	M5	2010	10	C	2	0		0	2	0	0	1	0	0	0	1	0	1	0
Mature	Ixtenco	M5	2011	1	C	2		0	0	2	0	0	0	0	0	0	0	0	0	0
Mature	Ixtenco	M5	2011	2	C	2		0	0	2	2	1	0	0	0	0	3	0	0	0
Mature	Ixtenco	M5	2011	3	C	2		0	0	2	0	2	0	0	0	0	2	0	0	0
Mature	Ixtenco	M5	2011	4	C	2		0	0	2	1	0	2	0	0	0	3	0	0	0
Mature	Ixtenco	M5	2011	5	C	2		0	0	2	0	0	0	2	0	0	2	0	0	0
Mature	Ixtenco	M5	2011	6	C	2		0	0	2	0	0	0	0	0	0	0	0	1	0
Mature	Ixtenco	M5	2011	7	C	2		0	0	2	0	0	1	0	0	0	1	0	0	0
Mature	Ixtenco	M5	2011	8	C	2		0	0	2	0	0	0	0	0	0	0	0	1	0
Young	Pilares	J5	2010	1	C	2	0		0	2	0	0	0	0	0	0	0	0	6	0
Young	Pilares	J5	2010	2	C	2	0		0	2	0	0	0	0	0	0	0	0	4	0
Young	Pilares	J5	2010	3	C	2	0		0	2	0	0	0	0	1	0	1	0	0	0
Young	Pilares	J5	2010	4	C	2	0		0	2	0	0	0	0	0	0	0	0	0	0
Young	Pilares	J5	2010	5	C	2	0		0	2	0	0	0	0	0	0	0	0	2	0
Young	Pilares	J5	2010	6	C	2	0		0	2	0	0	0	1	0	0	1	0	2	0
Young	Pilares	J5	2010	7	C	2	0		0	2	0	1	0	0	0	0	1	0	0	0
Young	Pilares	J5	2010	8	C	2	0		0	2	2	0	0	0	0	0	2	0	0	0
Young	Pilares	J5	2010	9	C	2	0		0	2	1	0	0	0	0	0	1	0	1	0
Young	Pilares	J5	2011	1	C	2		0	0	2	0	0	0	0	1	0	1	0	4	0
Young	Pilares	J5	2011	2	C	2		0	0	2	1	0	0	0	0	0	1	0	0	0
Young	Pilares	J5	2011	3	C	2		0	0	2	1	0	0	0	0	0	1	0	0	0
Young	Pilares	J5	2011	4	C	2		0	0	2	0	0	0	0	0	0	0	0	2	0
Young	Pilares	J5	2011	5	C	2		0	0	2	0	0	0	0	0	0	0	0	2	0
Young	Pilares	J5	2011	6	C	2		0	0	2	0	0	0	0	0	0	0	0	0	0
Young	Pilares	J5	2011	7	C	2		0	0	2	1	0	0	0	0	0	1	0	0	0
Young	Pilares	J5	2011	8	C	2		0	0	2	0	0	0	0	2	0	2	0	1	0
Mature	Ixtenco	M6	2010	1	T1	1	0		10	11	0	0	0	0	0	0	0	0	0	0
Mature	Ixtenco	M6	2010	2	T1	1	0		10	11	0	0	0	0	0	0	0	0	2	0
Mature	Ixtenco	M6	2010	3	T1	1	0		10	11	1	0	1	1	0	0	3	0	5	0
Mature	Ixtenco	M6	2010	4	T1	1	0		10	11	0	0	0	0	0	0	0	0	5	0
Mature	Ixtenco	M6	2010	5	T1	1	0		10	11	0	0	0	0	0	0	0	0	3	0
Mature	Ixtenco	M6	2010	6	T1	1	0		10	11	0	2	1	0	0	0	3	0	0	0
Mature	Ixtenco	M6	2010	7	T1	1	1		10	11	0	1	0	0	0	0	1	0	0	0
Mature	Ixtenco	M6	2010	8	T1	1	0		10	11	1	1	0	0	0	0	2	0	0	0
Mature	Ixtenco	M6	2010	9	T1	1	0		10	11	2	1	0	0	0	0	3	0	1	0
Mature	Ixtenco	M6	2010	10	T1	1	0		10	11	1	1	0	0	2	0	4	0	2	0
Mature	Ixtenco	M6	2011	1	T2	1		0	6	7	0	0	0	0	0	0	0	0	5	0
Mature	Ixtenco	M6	2011	2	T2	1		0	6	7	2	0	0	2	0	0	4	0	5	0
Mature	Ixtenco	M6	2011	3	T2	1		0	6	7	0	0	0	0	2	0	2	0	3	0
Mature	Ixtenco	M6	2011	4	T2	1		0	6	7	0	0	2	0	0	0	2	1	0	1
Mature	Ixtenco	M6	2011	5	T2	1		0	6	7	0	0	0	0	0	0	0	0	0	0
Mature	Ixtenco	M6	2011	6	T2	1		0	6	7	0	0	1	0	2	0	3	0	0	0
Mature	Ixtenco	M6	2011	7	T2	1		0	6	7	0	0	0	0	0	0	0	0	1	0
Mature	Ixtenco	M6	2011	8	T2	1		0	6	7	2	0	1	0	1	0	4	0	2	0
Young	Pilares	J6	2010	1	C	4	0		0	4	0	0	0	0	0	0	0	0	5	0
Young	Pilares	J6	2010	2	C	4	0		0	4	0	0	0	0	0	0	0	0	0	0
Young	Pilares	J6	2010	3	C	4	0		0	4	0	0	0	0	0	0	0	0	0	0
Young	Pilares	J6	2010	4	C	4	0		0	4	1	0	0	0	0	0	1	0	2	0
Young	Pilares	J6	2010	5	C	4	0		0	4	0	0	0	0	0	0	0	0	1	0
Young	Pilares	J6	2010	6	C	4	0		0	4	0	0	0	0	2	0	2	0	2	0
Young	Pilares	J6	2010	7	C	4	0		0	4	0	0	0	1	0	0	1	0	0	0
Young	Pilares	J6	2010	8	C	4	0		0	4	0	0	3	0	0	0	3	0	1	0
Young	Pilares	J6	2010	9	C	4	0		0	4	0	0	0	0	0	0	0	0	2	0
Young	Pilares	J6	2011	1	C	2		0	0	2	0	0	0	0	0	0	0	0	0	0
Young	Pilares	J6	2011	2	C	2		0	0	2	0	0	0	0	0	0	0	0	0	0
Young	Pilares	J6	2011	3	C	2		0	0	2	0	0	0	0	0	0	0	0	2	0
Young	Pilares	J6	2011	4	C	2		0	0	2	0	0	0	0	0	0	0	0	1	0
Young	Pilares	J6	2011	5	C	2		0	0	2	0	0	0	1	0	0	1	0	2	0
Young	Pilares	J6	2011	6	C	2		0	0	2	0	0	0	0	0	0	0	0	0	0
Young	Pilares	J6	2011	7	C	2		0	0	2	0	0	0	1	0	0	1	0	1	0
Young	Pilares	J6	2011	8	C	2		0	0	2	0	0	2	0	0	0	2	0	2	0
Mature	Ixtenco	M7	2010	1	T1	9	0		10	19	1	0	0	0	0	0	1	0	0	0
Mature	Ixtenco	M7	2010	2	T1	9	0		10	19	0	0	0	0	0	0	0	0	3	0
Mature	Ixtenco	M7	2010	3	T1	9	3		10	19	2	3	0	0	0	0	5	0	0	0
Mature	Ixtenco	M7	2010	4	T1	9	0		10	19	0	0	0	0	0	0	0	0	2	0
Mature	Ixtenco	M7	2010	5	T1	9	0		10	19	2	0	0	0	0	0	2	0	4	0
Mature	Ixtenco	M7	2010	6	T1	9	0		10	19	0	4	0	0	0	0	4	0	0	0
Mature	Ixtenco	M7	2010	7	T1	9	0		10	19	0	1	0	0	0	0	1	0	0	0
Mature	Ixtenco	M7	2010	8	T1	9	1		10	19	1	0	0	0	0	0	1	0	2	0
Mature	Ixtenco	M7	2010	9	T1	9	0		10	19	1	0	1	0	0	0	2	0	1	0
Mature	Ixtenco	M7	2010	10	T1	9	0		10	19	0	6	1	0	2	0	9	0	1	0
Mature	Ixtenco	M7	2011	1	T2	9		0	6	15	0	0	0	0	0	0	0	0	0	0
Mature	Ixtenco	M7	2011	2	T2	9		1	6	15	2	0	1	2	0	0	5	0	2	1
Mature	Ixtenco	M7	2011	3	T2	9		0	6	15	0	2	0	0	0	0	2	0	4	0
Mature	Ixtenco	M7	2011	4	T2	9		0	6	15	0	0	0	0	0	0	0	0	0	0
Mature	Ixtenco	M7	2011	5	T2	9		0	6	15	0	0	0	2	1	0	3	0	0	0
Mature	Ixtenco	M7	2011	6	T2	9		0	6	15	0	0	1	2	0	4	7	1	2	1
Mature	Ixtenco	M7	2011	7	T2	9		0	6	15	0	2	0	1	1	0	4	0	1	0
Mature	Ixtenco	M7	2011	8	T2	9		0	6	15	2	0	1	0	0	0	3	0	1	0
Young	Pilares	J7	2010	1	C	0	0		0	0	0	0	0	0	0	0	0	0	0	0
Young	Pilares	J7	2010	2	C	0	0		0	0	0	1	1	0	0	0	2	0	1	0
Young	Pilares	J7	2010	3	C	0	0		0	0	0	0	0	0	0	0	0	0	0	0
Young	Pilares	J7	2010	4	C	0	0		0	0	0	0	0	0	0	0	0	0	2	0
Young	Pilares	J7	2010	5	C	0	0		0	0	0	0	0	0	0	0	0	0	0	0
Young	Pilares	J7	2010	6	C	0	0		0	0	0	1	0	0	0	0	1	0	1	0
Young	Pilares	J7	2010	7	C	0	0		0	0	2	1	0	0	0	0	3	0	0	0
Young	Pilares	J7	2010	8	C	0	0		0	0	0	5	0	0	0	0	5	0	0	0
Young	Pilares	J7	2010	9	C	0	0		0	0	0	0	0	0	0	0	0	0	3	0
Young	Pilares	J7	2011	1	C	0		0	0	0	0	0	0	0	0	0	0	0	1	0
Young	Pilares	J7	2011	2	C	0		0	0	0	0	0	0	0	0	0	0	0	0	0
Young	Pilares	J7	2011	3	C	0		0	0	0	0	0	0	0	0	0	0	0	2	0
Young	Pilares	J7	2011	4	C	0		0	0	0	0	0	0	0	0	0	0	0	0	0
Young	Pilares	J7	2011	5	C	0		0	0	0	0	0	0	0	0	0	0	0	1	0
Young	Pilares	J7	2011	6	C	0		0	0	0	0	0	0	0	5	0	5	0	0	0
Young	Pilares	J7	2011	7	C	0		0	0	0	0	0	0	0	0	0	0	0	0	0
Young	Pilares	J7	2011	8	C	0		0	0	0	1	0	0	0	0	0	1	0	3	0
Mature	Ixtenco	M8	2010	1	C	0	0		0	0	0	2	0	0	0	0	2	0	5	0
Mature	Ixtenco	M8	2010	2	C	0	0		0	0	0	0	0	0	0	0	0	0	1	0
Mature	Ixtenco	M8	2010	3	C	0	0		0	0	0	0	0	0	0	0	0	0	3	0
Mature	Ixtenco	M8	2010	4	C	0	0		0	0	0	0	0	0	0	0	0	0	1	0
Mature	Ixtenco	M8	2010	5	C	0	0		0	0	0	0	0	0	0	0	0	0	0	0
Mature	Ixtenco	M8	2010	6	C	0	0		0	0	0	0	0	0	0	0	0	0	0	0
Mature	Ixtenco	M8	2010	7	C	0	0		0	0	0	0	0	0	0	0	0	0	0	0
Mature	Ixtenco	M8	2010	8	C	0	0		0	0	0	0	0	0	0	0	0	0	0	0
Mature	Ixtenco	M8	2010	9	C	0	0		0	0	0	0	0	0	2	0	2	0	0	0
Mature	Ixtenco	M8	2010	10	C	0	0		0	0	0	0	0	0	0	0	0	0	3	0
Mature	Ixtenco	M8	2011	1	C	6		0	0	6	0	0	0	0	0	0	0	0	3	0
Mature	Ixtenco	M8	2011	2	C	6		0	0	6	2	0	0	0	0	0	2	0	1	0
Mature	Ixtenco	M8	2011	3	C	6		0	0	6	2	0	0	1	0	0	3	0	0	0
Mature	Ixtenco	M8	2011	4	C	6		0	0	6	0	0	0	0	2	0	2	0	0	0
Mature	Ixtenco	M8	2011	5	C	6		0	0	6	1	0	1	0	0	0	2	0	0	0
Mature	Ixtenco	M8	2011	6	C	6		0	0	6	0	0	0	0	2	0	2	1	0	0
Mature	Ixtenco	M8	2011	7	C	6		0	0	6	0	0	0	1	0	0	1	0	0	0
Mature	Ixtenco	M8	2011	8	C	6		0	0	6	0	0	1	0	0	0	1	0	3	0
Young	Pilares	J8	2010	1	C	5	0		0	5	0	0	0	0	0	0	0	0	0	0
Young	Pilares	J8	2010	2	C	5	0		0	5	0	0	0	0	0	0	0	0	1	0
Young	Pilares	J8	2010	3	C	5	0		0	5	1	0	0	0	0	0	1	0	0	0
Young	Pilares	J8	2010	4	C	5	0		0	5	1	0	0	0	0	0	1	0	0	0
Young	Pilares	J8	2010	5	C	5	0		0	5	0	0	0	0	0	0	0	0	0	0
Young	Pilares	J8	2010	6	C	5	0		0	5	0	0	0	0	0	0	0	0	0	0
Young	Pilares	J8	2010	7	C	5	0		0	5	0	0	0	0	0	0	0	0	1	0
Young	Pilares	J8	2010	8	C	5	0		0	5	0	0	0	0	0	0	0	0	0	0
Young	Pilares	J8	2010	9	C	5	0		0	5	0	0	0	0	0	0	0	0	1	0
Young	Pilares	J8	2011	1	C	1		0	0	1	0	0	0	0	0	0	0	0	1	0
Young	Pilares	J8	2011	2	C	1		0	0	1	0	0	0	1	0	0	1	0	0	0
Young	Pilares	J8	2011	3	C	1		0	0	1	0	0	0	0	0	0	0	0	0	0
Young	Pilares	J8	2011	4	C	1		0	0	1	0	0	0	0	0	0	0	0	0	0
Young	Pilares	J8	2011	5	C	1		0	0	1	0	0	0	0	0	0	0	0	0	0
Young	Pilares	J8	2011	6	C	1		0	0	1	0	0	0	0	0	0	0	0	1	0
Young	Pilares	J8	2011	7	C	1		0	0	1	0	1	0	0	0	0	1	0	0	0
Young	Pilares	J8	2011	8	C	1		0	0	1	1	0	0	0	2	0	3	0	1	0
Mature	Ixtenco	M9	2010	1	C	8	0		0	8	0	0	0	0	0	0	0	0	1	0
Mature	Ixtenco	M9	2010	2	C	8	0		0	8	0	0	0	0	0	0	0	0	5	0
Mature	Ixtenco	M9	2010	3	C	8	0		0	8	0	1	0	0	0	0	1	0	0	0
Mature	Ixtenco	M9	2010	4	C	8	0		0	8	0	0	0	0	0	0	0	0	1	0
Mature	Ixtenco	M9	2010	5	C	8	0		0	8	0	0	0	0	2	0	2	0	3	0
Mature	Ixtenco	M9	2010	6	C	8	0		0	8	0	0	0	0	0	0	0	0	0	0
Mature	Ixtenco	M9	2010	7	C	8	0		0	8	0	2	0	1	0	0	3	0	0	0
Mature	Ixtenco	M9	2010	8	C	8	0		0	8	0	0	0	0	0	0	0	0	0	0
Mature	Ixtenco	M9	2010	9	C	8	0		0	8	0	0	0	1	0	0	1	0	2	0
Mature	Ixtenco	M9	2010	10	C	8	0		0	8	1	1	0	0	0	0	2	0	1	0
Young	Pilares	J9	2010	1	T1	0	0		10	10	0	0	0	0	0	0	0	0	0	0
Young	Pilares	J9	2010	2	T1	0	0		10	10	0	0	0	0	0	0	0	0	0	0
Young	Pilares	J9	2010	3	T1	0	0		10	10	0	0	0	2	0	0	2	0	0	0
Young	Pilares	J9	2010	4	T1	0	0		10	10	0	0	0	0	0	0	0	0	1	0
Young	Pilares	J9	2010	5	T1	0	0		10	10	0	0	0	0	0	0	0	0	0	0
Young	Pilares	J9	2010	6	T1	0	0		10	10	0	0	0	0	0	0	0	0	0	0
Young	Pilares	J9	2010	7	T1	0	0		10	10	0	0	0	0	0	0	0	0	0	0
Young	Pilares	J9	2010	8	T1	0	0		10	10	0	0	0	0	0	0	0	0	0	0
Young	Pilares	J9	2010	9	T1	0	0		10	10	1	0	0	0	0	0	1	0	0	0
Mature	Ixtenco	M10	2010	1	C	0	0		0	0	0	0	0	0	0	0	0	0	0	0
Mature	Ixtenco	M10	2010	2	C	0	0		0	0	0	0	0	0	0	0	0	0	0	0
Mature	Ixtenco	M10	2010	3	C	0	0		0	0	0	0	0	0	0	0	0	0	0	0
Mature	Ixtenco	M10	2010	4	C	0	0		0	0	0	0	0	0	0	0	0	0	0	0
Mature	Ixtenco	M10	2010	5	C	0	0		0	0	0	0	0	0	0	0	0	0	0	0
Mature	Ixtenco	M10	2010	6	C	0	0		0	0	0	0	0	0	0	0	0	0	0	0
Mature	Ixtenco	M10	2010	7	C	0	0		0	0	0	0	0	0	0	0	0	0	0	0
Mature	Ixtenco	M10	2010	8	C	0	0		0	0	0	0	0	0	0	0	0	0	0	0
Mature	Ixtenco	M10	2010	9	C	0	0		0	0	0	0	0	0	0	0	0	0	0	0
Mature	Ixtenco	M10	2010	10	C	0	0		0	0	5	0	0	0	0	0	5	0	0	0
Young	Pilares	J10	2010	1	T1	0	0		10	10	0	0	0	0	0	0	0	0	0	0
Young	Pilares	J10	2010	2	T1	0	0		10	10	0	0	0	0	0	0	0	0	0	0
Young	Pilares	J10	2010	3	T1	0	0		10	10	1	0	0	0	0	0	1	0	0	0
Young	Pilares	J10	2010	4	T1	0	0		10	10	0	0	0	2	0	0	2	0	0	0
Young	Pilares	J10	2010	5	T1	0	0		10	10	0	0	0	1	1	3	5	1	0	1
Young	Pilares	J10	2010	6	T1	0	0		10	10	0	0	0	0	0	0	0	0	1	0
Young	Pilares	J10	2010	7	T1	0	0		10	10	0	0	0	0	0	0	0	0	0	0
Young	Pilares	J10	2010	8	T1	0	0		10	10	0	0	0	0	0	0	0	0	0	0
Young	Pilares	J10	2010	9	T1	0	0		10	10	0	0	0	0	0	0	0	0	0	0
Young	Pilares	J10	2011	1	T2	0		0	6	6	0	0	0	0	0	0	0	0	0	0
Young	Pilares	J10	2011	2	T2	0		0	6	6	0	0	0	1	0	0	1	0	0	0
Young	Pilares	J10	2011	3	T2	0		0	6	6	0	0	0	1	0	0	1	0	0	0
Young	Pilares	J10	2011	4	T2	0		0	6	6	0	0	0	0	0	5	5	2	0	2
Young	Pilares	J10	2011	5	T2	0		0	6	6	0	0	0	0	0	0	0	0	1	0
Young	Pilares	J10	2011	6	T2	0		0	6	6	2	0	0	0	0	0	2	0	0	0
Young	Pilares	J10	2011	7	T2	0		0	6	6	2	0	0	0	0	0	2	1	0	1
Young	Pilares	J10	2011	8	T2	0		0	6	6	0	0	0	1	0	0	1	0	0	0
Mature	Ixtenco	M11	2010	1	C	0	0		0	0	0	0	0	0	0	0	0	0	0	0
Mature	Ixtenco	M11	2010	2	C	0	0		0	0	0	0	0	0	0	0	0	0	1	0
Mature	Ixtenco	M11	2010	3	C	0	0		0	0	0	0	0	0	0	0	0	0	0	0
Mature	Ixtenco	M11	2010	4	C	0	0		0	0	0	0	0	0	0	0	0	0	0	0
Mature	Ixtenco	M11	2010	5	C	0	0		0	0	0	0	0	0	0	0	0	0	1	0
Mature	Ixtenco	M11	2010	6	C	0	0		0	0	0	0	0	0	0	0	0	0	0	0
Mature	Ixtenco	M11	2010	7	C	0	0		0	0	0	0	0	0	0	0	0	0	0	0
Mature	Ixtenco	M11	2010	8	C	0	0		0	0	0	0	0	0	0	0	0	0	0	0
Mature	Ixtenco	M11	2010	9	C	0	0		0	0	0	0	0	0	0	0	0	0	0	0
Mature	Ixtenco	M11	2010	10	C	0	0		0	0	0	0	0	0	0	0	0	0	2	0
Young	Pilares	J11	2010	1	T1	0	0		10	10	0	0	0	0	0	0	0	0	1	0
Young	Pilares	J11	2010	2	T1	0	0		10	10	0	0	0	0	0	0	0	0	0	0
Young	Pilares	J11	2010	3	T1	0	0		10	10	0	0	0	2	0	0	2	1	1	1
Young	Pilares	J11	2010	4	T1	0	0		10	10	0	0	0	1	0	0	1	0	0	0
Young	Pilares	J11	2010	5	T1	0	0		10	10	0	0	0	0	0	4	4	1	0	1
Young	Pilares	J11	2010	6	T1	0	0		10	10	0	0	0	0	2	2	4	1	0	1
Young	Pilares	J11	2010	7	T1	0	0		10	10	0	0	0	0	0	0	0	0	1	0
Young	Pilares	J11	2010	8	T1	0	0		10	10	0	0	0	0	0	0	0	0	0	0
Young	Pilares	J11	2010	9	T1	0	0		10	10	1	0	0	0	0	0	1	0	0	0
Young	Pilares	J11	2011	1	T2	1		0	6	7	0	0	0	0	0	0	0	0	0	0
Young	Pilares	J11	2011	2	T2	1		0	6	7	0	0	0	0	0	0	0	0	1	0
Young	Pilares	J11	2011	3	T2	1		0	6	7	2	0	0	0	0	0	2	0	0	0
Young	Pilares	J11	2011	4	T2	1		0	6	7	0	0	0	0	0	0	0	0	0	0
Young	Pilares	J11	2011	5	T2	1		0	6	7	0	0	0	0	0	0	0	0	0	0
Young	Pilares	J11	2011	6	T2	1		0	6	7	0	0	4	0	0	0	4	0	1	0
Young	Pilares	J11	2011	7	T2	1		0	6	7	0	0	0	1	0	0	1	0	0	0
Young	Pilares	J11	2011	8	T2	1		0	6	7	0	0	0	2	1	0	3	0	0	0
Mature	Ixtenco	M12	2010	1	C	5	0		0	5	0	0	0	0	0	0	0	0	5	0
Mature	Ixtenco	M12	2010	2	C	5	0		0	5	3	0	0	0	0	0	3	0	1	0
Mature	Ixtenco	M12	2010	3	C	5	0		0	5	3	1	0	0	0	0	4	0	3	0
Mature	Ixtenco	M12	2010	4	C	5	0		0	5	1	0	0	0	0	0	1	0	1	0
Mature	Ixtenco	M12	2010	5	C	5	0		0	5	0	0	0	0	0	0	0	0	0	0
Mature	Ixtenco	M12	2010	6	C	5	0		0	5	0	0	0	0	0	0	0	0	0	0
Mature	Ixtenco	M12	2010	7	C	5	0		0	5	0	0	1	3	0	0	4	0	0	0
Mature	Ixtenco	M12	2010	8	C	5	0		0	5	1	0	0	0	0	0	1	0	1	0
Mature	Ixtenco	M12	2010	9	C	5	0		0	5	0	0	0	0	0	0	0	0	2	0
Mature	Ixtenco	M12	2010	10	C	5	0		0	5	0	0	0	0	0	0	0	0	2	0
Young	Pilares	J12	2010	1	T1	0	0		10	10	0	0	0	0	0	0	0	0	0	0
Young	Pilares	J12	2010	2	T1	0	0		10	10	0	0	0	0	0	0	0	0	0	0
Young	Pilares	J12	2010	3	T1	0	0		10	10	0	0	0	0	0	0	0	0	0	0
Young	Pilares	J12	2010	4	T1	0	0		10	10	1	0	0	0	0	0	1	0	0	0
Young	Pilares	J12	2010	5	T1	0	0		10	10	0	0	0	0	0	0	0	0	0	0
Young	Pilares	J12	2010	6	T1	0	0		10	10	0	0	0	0	2	0	2	1	1	1
Young	Pilares	J12	2010	7	T1	0	0		10	10	0	0	0	0	2	0	2	1	0	1
Young	Pilares	J12	2010	8	T1	0	0		10	10	0	0	0	0	0	0	2	0	0	0
Young	Pilares	J12	2010	9	T1	0	0		10	10	0	0	0	0	0	0	0	0	0	0
